# Supplementary material
Source: MDPI journal article supplement (https://www.mdpi.com/2304-6740/12/2/51)
Supplement: s1 [file s1]

## ZnO–Doped CaO Binary Core–Shell Catalysts for Biodiesel Production via Mexican Palm Oil Transesterification

M. G. Arenas-Quevedo<sup>1</sup>, M. E. Manríquez<sup>1</sup>, J. A. Wang<sup>1\*</sup>, O. Elizalde-Solís<sup>1</sup>, J. González-García<sup>2</sup>, A. Zúñiga-Moreno<sup>1</sup> and L. F. Chen<sup>1</sup>

<sup>1</sup>Escuela Superior de Ingeniería Química e Industrias Extractivas, Instituto Politécnico Nacional, Col. Zacatenco, Ciudad de México 07738, Mexico; 5167chaloarenas@gmail.com (M.G.A.-Q.); mmanriquez@ipn.mx (M.E.M.); oelizalde@ipn.mx (O.E.-S.); azunigam@ipn.mx (A.Z.-M.); lchen@ipn.mx (L.F.C.)

<sup>2</sup>TecNM-Tecnológico de Estudios Superiores de Coacalco. 16 de Septiembre 54, Col. Cabecera municipal, Estado de México 55700, Mexico; julio\_gonzalez.iqu@tesco.edu.mx

\*Correspondence: jwang@ipn.mx

### FTIR characterization of biodiesel

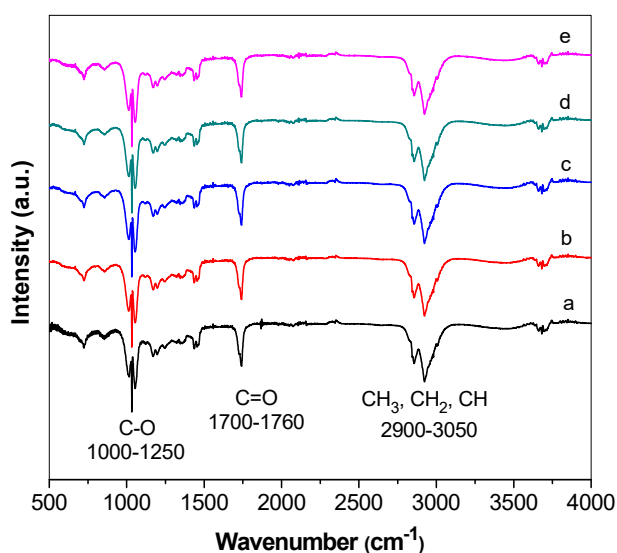

**Figure S1.** FTIR spectra for palm oil-base biodiesel obtained with thermal treated catalysts and after purification.

(a): CaO; (b) CaO–ZnO–5%; (c) CaO–ZnO–10%; (d) CaO–ZnO–15%; (e) CaO–ZnO–20%.
